# Supplementary material for: A multifunctional layered Ti3C2Tx/VS2 composite sulfur host for promoting the conversion of lithium polysulfides in lithium–sulfur batteries
Source: Royal Society of Chemistry journal article supplement (doi:10.1039/d4ta03797a), 2024-01-01
Supplement: d4ta03797a1.pdf [file d4ta03797a1.pdf]

## Supporting Information

### **A Multifunctional Layered $\text{Ti}_3\text{C}_2\text{T}_x/\text{VS}_2$ Composite Sulfur Host for Promoting the Conversion of Lithium Polysulfides in Lithium-Sulfur Batteries**

Guisheng Deng,<sup>a</sup> Wen Xi,<sup>a</sup> Junpu Zhang,<sup>a</sup> Youfang Zhang,<sup>b</sup> Rui Wang,<sup>a\*</sup> Yansheng Gong,<sup>a</sup> Beibei He,<sup>a</sup> Huanwen Wang,<sup>a</sup> Jun Jin<sup>a\*</sup>

<sup>a</sup>*Faculty of Materials Science and Chemistry, China University of Geosciences, Wuhan 430074, China;*

<sup>b</sup>*Hubei Key Laboratory of Polymer Materials, Ministry of Education Key Laboratory for Green Preparation and Application of Functional Materials, School of Materials Science and Engineering, Hubei University, Wuhan 430062, China.*

*\*Corresponding author. E-mail address: jinjun@cug.edu.cn; wangrui@cug.edu.cn*

## **1. Material characterizations**

The morphologies and structures of the synthesized composites are characterized using a scanning electron microscope (SEM, Hitachi SU-3500, Japan) and transmission electron microscope (TEM, FEI Talos F200S). The X-ray diffraction (XRD) patterns of the samples are obtained using a D8-FOCUS (Bruker AXS, Panalytical) instrument with Cu K $\alpha$  radiation (1.5418 Å) at 40 kV and 40 mA. The specific surface areas and pore size distributions are tested on Micrometrics equipment at nitrogen adsorption-desorption measurements (ASAP-2460). The chemical states of Ti<sub>3</sub>C<sub>2</sub>T<sub>x</sub>/VS<sub>2</sub>, Ti<sub>3</sub>C<sub>2</sub>T<sub>x</sub>, and VS<sub>2</sub> are investigated by X-ray photoelectron spectroscopy (XPS, Thermo Scientific K-Alpha).

## **2. Electrochemical characterizations**

### **2.1 Preparation and testing of cathodes**

The prepared material is ground and mixed with sulfur powder in a ratio of 3:7, then hydrothermally treated at 155 °C for 12 hours under argon atmosphere to obtain the Ti<sub>3</sub>C<sub>2</sub>T<sub>x</sub>/VS<sub>2</sub>/S composite. The resulting sulfur composite material (70 wt%) and carbon nanotube (CNT) solution (30 wt%) are mixed with DI water to form a slurry, which is evenly coated onto aluminum foil. The coated foil is dried at 60 °C for 12 hours with sulfur mass loading of 0.8~0.9 mg cm<sup>-1</sup>. The Li-S batteries are assembled in an argon-filled glove box in CR2032 button cells using 1.0 M LiTFSI in 1,3-dioxolane (DOL) / 1,2-dimethoxyethane (DME) (1:1 vol%) with 2% LiNO<sub>3</sub> as electrolyte (0.03 mL).

## 2.2 Preparation of 3D-printed electrodes

The printing slurry is prepared as described above and loaded into a 3 mL syringe. The syringe is connected to a tri-axis MUSASHI dispenser (SM200SX-3A-SS-01-MU-STK) for printing grid-shaped electrodes on the cathode shells at a pressure of 0.25 MPa and a printing speed of 1 mm s<sup>-1</sup>. Afterward, the printed electrodes are placed in a freezer overnight and freeze-dried to obtain the 3D-printed cathodes.

## 2.3 Polysulfides adsorption test

For the electrolyte preparation, 0.075 mmol of Li<sub>2</sub>S and 0.375 mmol of sulfur powders are dissolved in 7.5 mL of DOL and 7.5 mL of DME at 70 °C with stirring until completely dissolved. 15 mg of Ti<sub>3</sub>C<sub>2</sub>T<sub>x</sub>/VS<sub>2</sub> (or Ti<sub>3</sub>C<sub>2</sub>T<sub>x</sub>, VS<sub>2</sub>) powder is added to 3 mL of the above solution, and the color change of the solution is recorded. Besides, the diluted supernatant is analyzed using a UV-vis spectrophotometer.

## 2.4 Linear scanning voltammetry (LSV) experiments

5 mg of active material is dispersed in 5 mL of ethanol under sonication. Then, 0.04 mL of mixture solution is doped on the carbon paper (1×1 cm<sup>2</sup>) and then dried. A three-electrode test is conducted using an Ag/AgCl reference electrode and a platinum foil counter electrode in a 0.1 M Li<sub>2</sub>S methanol solution as the electrolyte. The measurement is carried out at a scan rate of 5 mV s<sup>-1</sup> using an electrochemical workstation (CHI660E) within a voltage window of -0.8 to 0 V.

## 2.5 Assembly and testing of symmetrical cells

The tested materials and CNT solution are mixed into a slurry at a mass ratio of

7:3, coated on aluminum foil, and dried at 60 °C for 12 hours. The symmetrical cells are assembled in an argon-filled glove box using test materials as both the working electrode and counter electrode, while the electrolyte consists of 0.06 mL of 0.2 M  $\text{Li}_2\text{S}_6$  solution. The CV curves of the symmetric units are measured at scan rates of 2, 4, 6, 8, and 10  $\text{mV s}^{-1}$ , with a voltage range of -1 to 1 V.

## 2.6 $\text{Li}_2\text{S}$ nucleation and dissolution test

To study the kinetics of solid-liquid transformation of LiPSs, a 0.2 M  $\text{Li}_2\text{S}_8$  solution is prepared using tetramethylene glycol dimethyl ether as the solvent, with the addition of 1 M LiTFSI. A symmetrical battery is assembled using  $\text{Ti}_3\text{C}_2\text{T}_x/\text{VS}_2/\text{S}$  as working electrode, PP film as separator, and lithium metal as counter electrode, respectively. 0.02 mL of normal electrolyte and 0.02 mL of prepared  $\text{Li}_2\text{S}_8$  solution are added drop by drop. The battery is initially discharged at a constant current of 0.112 mA until the voltage reaches 2.07 V, followed by a constant voltage discharge at 2.02 V until the current dropped below 0.001 mA.

To examine the rate of dissolution conversion of  $\text{Li}_2\text{S}$  to LiPSs, the same cell configuration is employed. The cell is discharged to 1.7 V at a constant current of 0.112 mA and then charged at a constant voltage of 2.4 V until the current reaches 0.01 mA.

**Table S1.** Percentage nucleation and *activation* time of  $\text{Li}_2\text{S}$  for  $\text{Ti}_3\text{C}_2\text{T}_x/\text{VS}_2/\text{S}$ ,  $\text{Ti}_3\text{C}_2\text{T}_x/\text{S}$ , and  $\text{VS}_2/\text{S}$ .

| Parameters                                          | $\text{Ti}_3\text{C}_2\text{T}_x/\text{VS}_2/\text{S}$ | $\text{Ti}_3\text{C}_2\text{T}_x/\text{S}$ | $\text{VS}_2/\text{S}$ |
|-----------------------------------------------------|--------------------------------------------------------|--------------------------------------------|------------------------|
| Percentage nucleation time of $\text{Li}_2\text{S}$ | 26.9%                                                  | 28.0%                                      | 28.0%                  |
| Percentage activation time of $\text{Li}_2\text{S}$ | 1.2%                                                   | 1.3%                                       | 1.8%                   |

**Table S2.** Li<sup>+</sup> diffusion coefficients of Ti<sub>3</sub>C<sub>2</sub>T<sub>x</sub>/VS<sub>2</sub>/S, Ti<sub>3</sub>C<sub>2</sub>T<sub>x</sub>/S, and VS<sub>2</sub>/S.

| Parameters                                                | Ti <sub>3</sub> C <sub>2</sub> T <sub>x</sub> /VS <sub>2</sub> /S | Ti <sub>3</sub> C <sub>2</sub> T <sub>x</sub> /S | VS <sub>2</sub> /S    |
|-----------------------------------------------------------|-------------------------------------------------------------------|--------------------------------------------------|-----------------------|
| $D_{Li}^{+}$ at peak A (cm <sup>2</sup> s <sup>-1</sup> ) | 1.26×10 <sup>-8</sup>                                             | 3.97×10 <sup>-9</sup>                            | 5.93×10 <sup>-9</sup> |
| $D_{Li}^{+}$ at peak B (cm <sup>2</sup> s <sup>-1</sup> ) | 2.27×10 <sup>-9</sup>                                             | 1.71×10 <sup>-9</sup>                            | 1.93×10 <sup>-9</sup> |
| $D_{Li}^{+}$ at peak C (cm <sup>2</sup> s <sup>-1</sup> ) | 5.04×10 <sup>-9</sup>                                             | 3.85×10 <sup>-9</sup>                            | 4.68×10 <sup>-9</sup> |

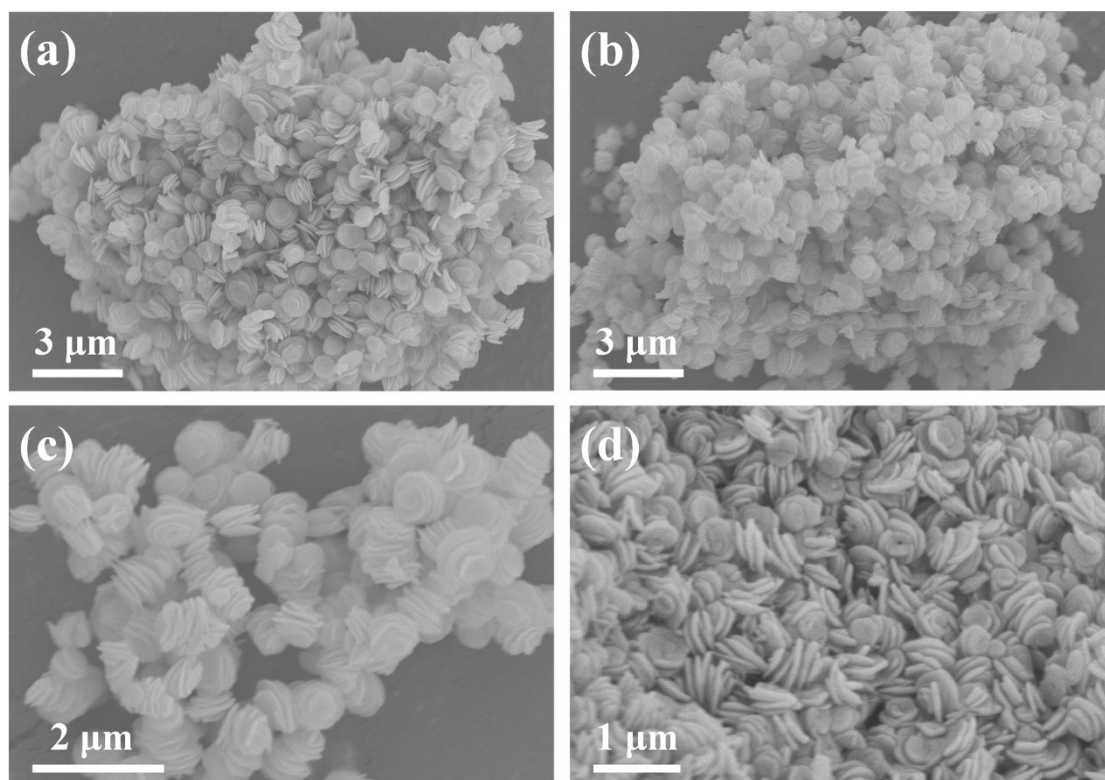

**Figure S1.** SEM images of VS<sub>2</sub> nanosheets with different magnifications.

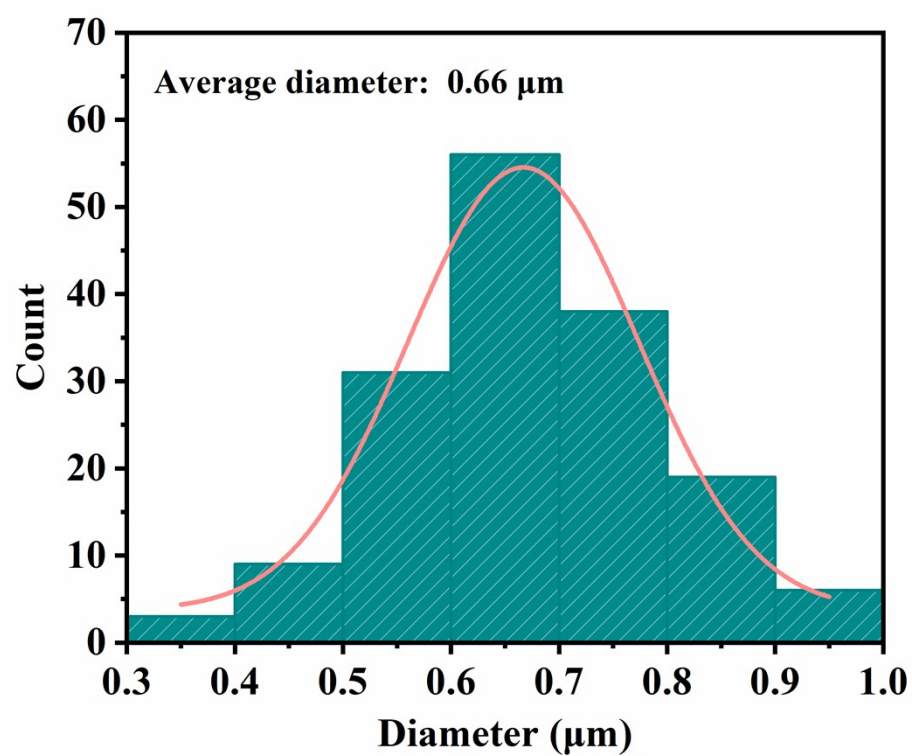

**Figure S2.** Statistical plot of diameter distribution of VS<sub>2</sub> nanosheets.



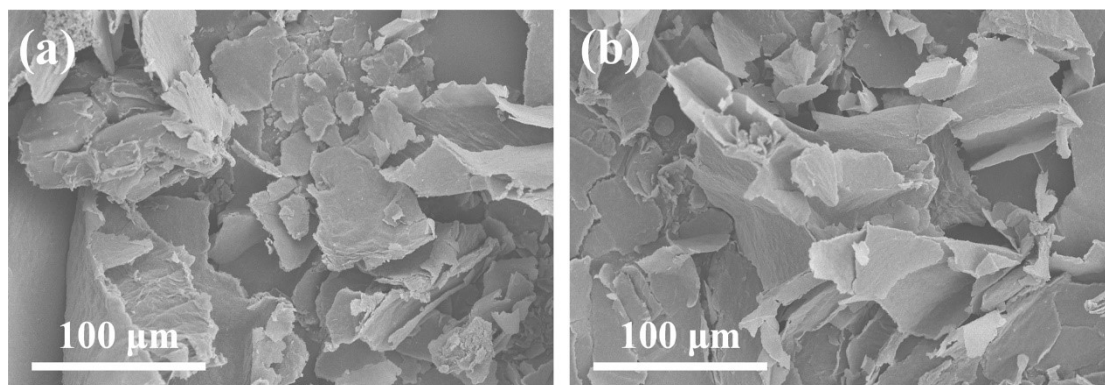

**Figure S3.** SEM images of the few-layer  $\text{Ti}_3\text{C}_2\text{T}_x$  sheets.

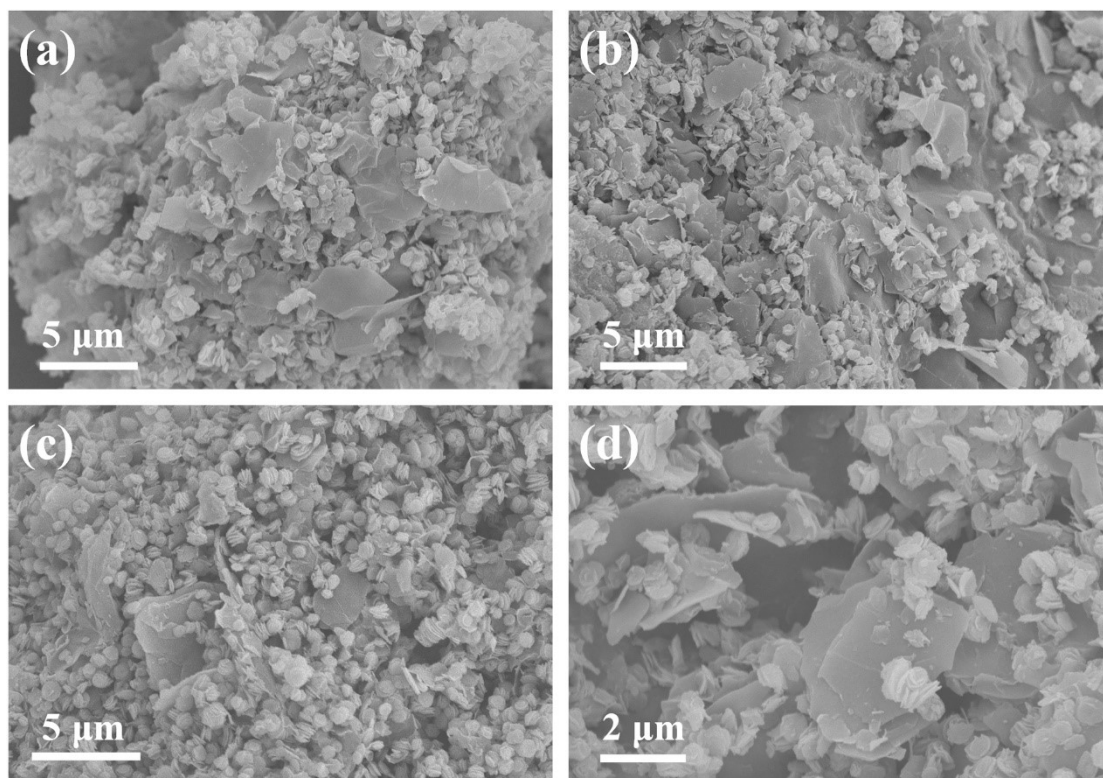

**Figure S4.** SEM images of  $\text{Ti}_3\text{C}_2\text{T}_x/\text{VS}_2$  with different magnifications.

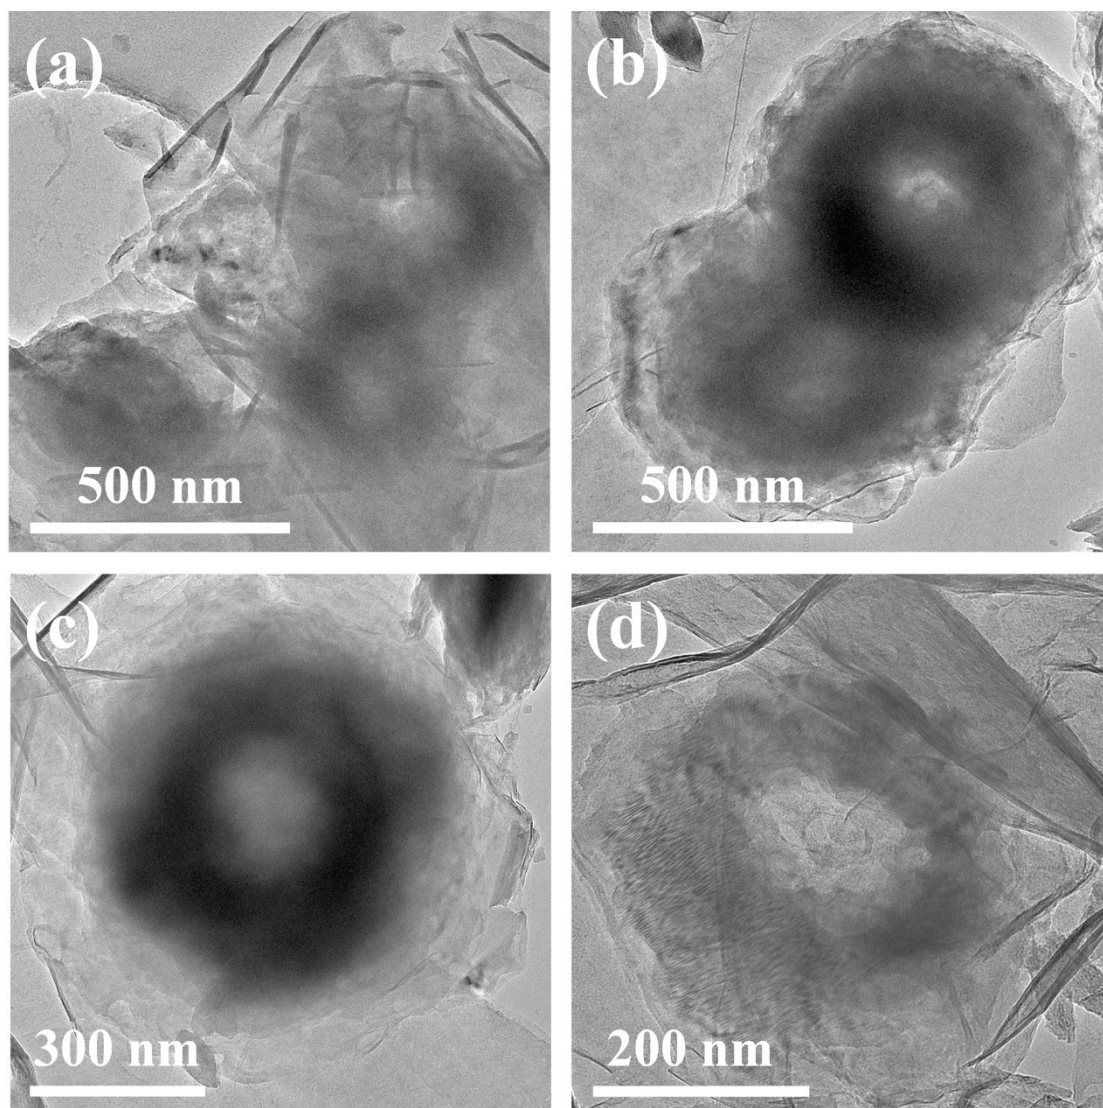

**Figure S5.** TEM images of  $\text{Ti}_3\text{C}_2\text{T}_x/\text{VS}_2$ .

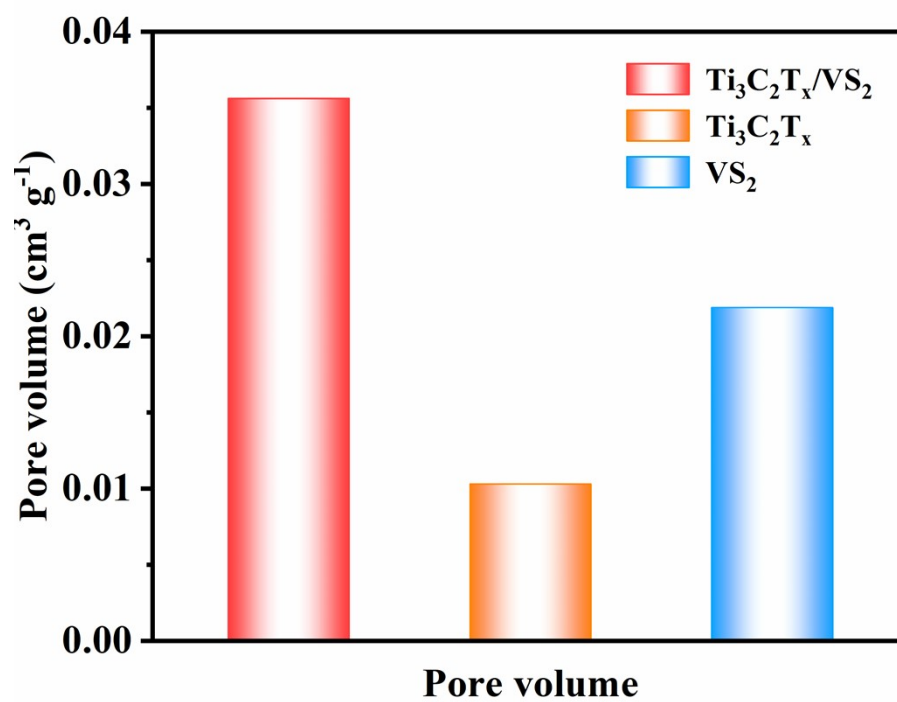

**Figure S6.** The pore volumes of  $\text{Ti}_3\text{C}_2\text{T}_x/\text{VS}_2$ ,  $\text{Ti}_3\text{C}_2\text{T}_x$ , and  $\text{VS}_2$ .

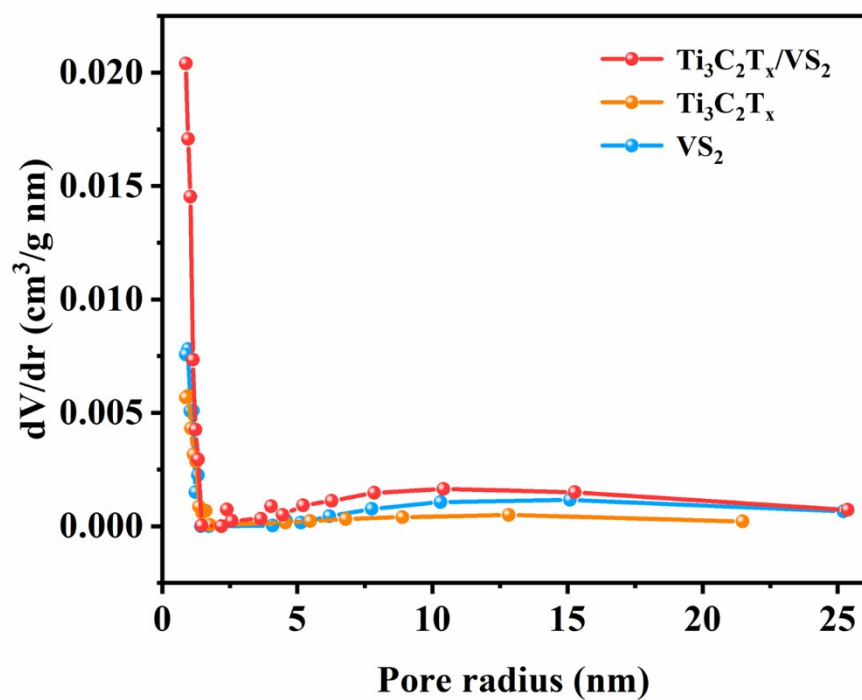

**Figure S7.** The pore size distribution of  $\text{Ti}_3\text{C}_2\text{T}_x/\text{VS}_2$ ,  $\text{Ti}_3\text{C}_2\text{T}_x$ , and  $\text{VS}_2$ .

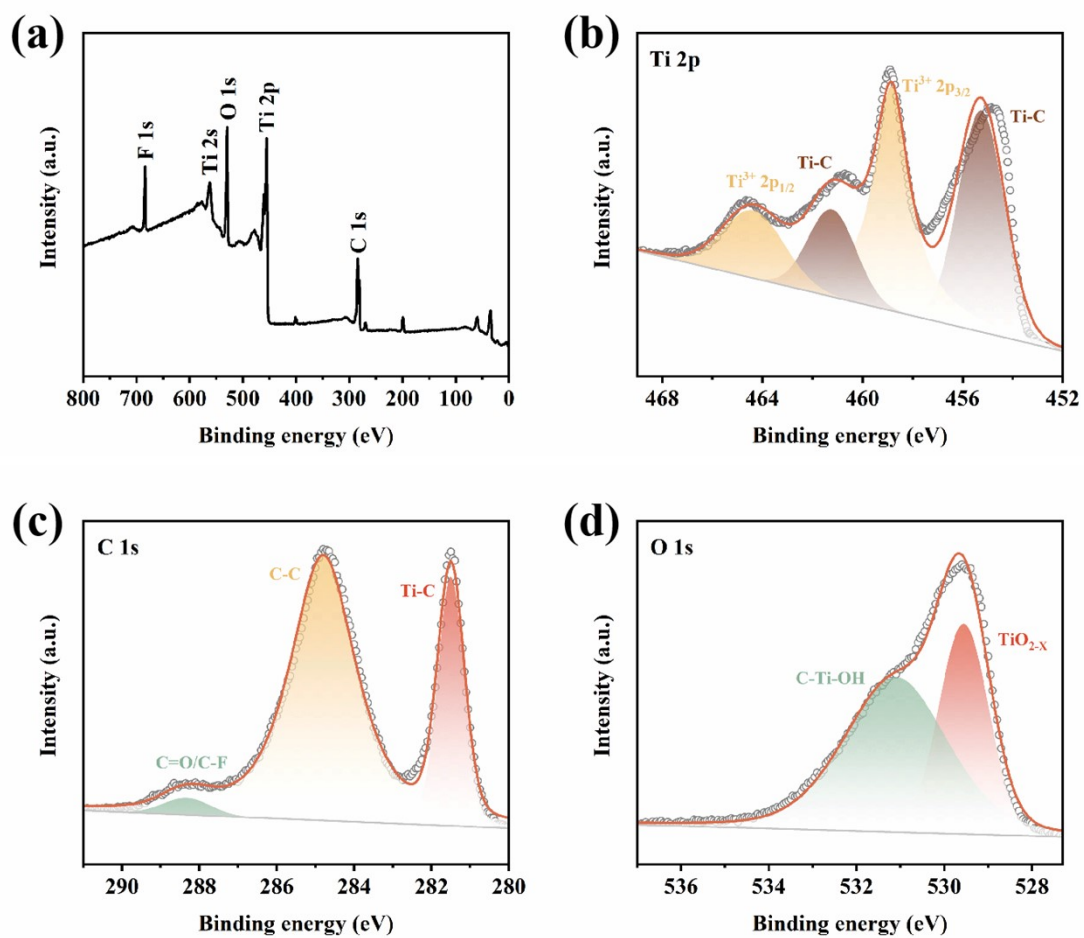

**Figure S8.** (a-d) XPS spectra of  $\text{Ti}_3\text{C}_2\text{T}_x$ : (a) survey, (b) Ti 2p, (c) C 1s, and (d) O 1s.

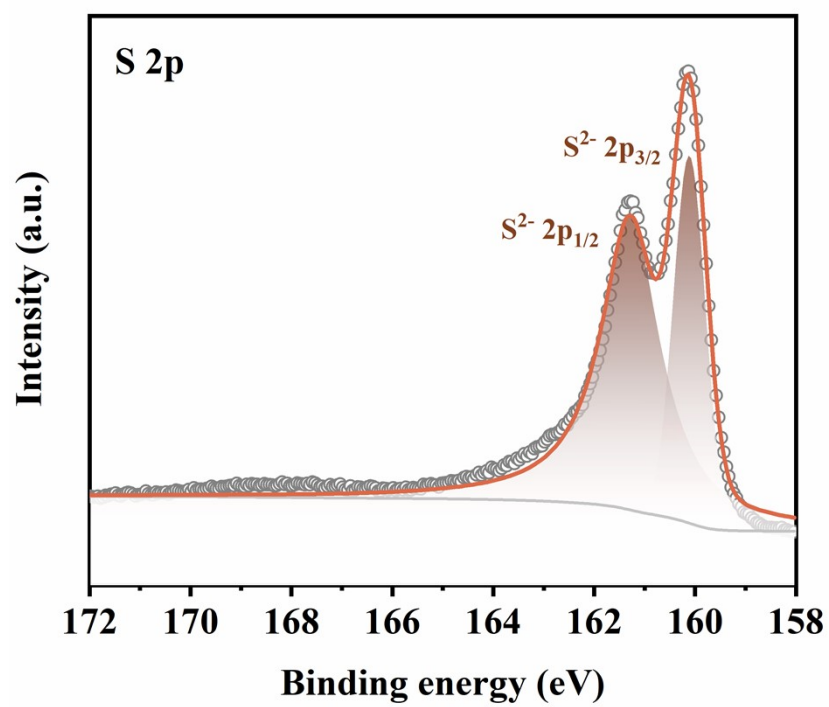

**Figure S9.** XPS spectrum of VS<sub>2</sub>: S 2p.

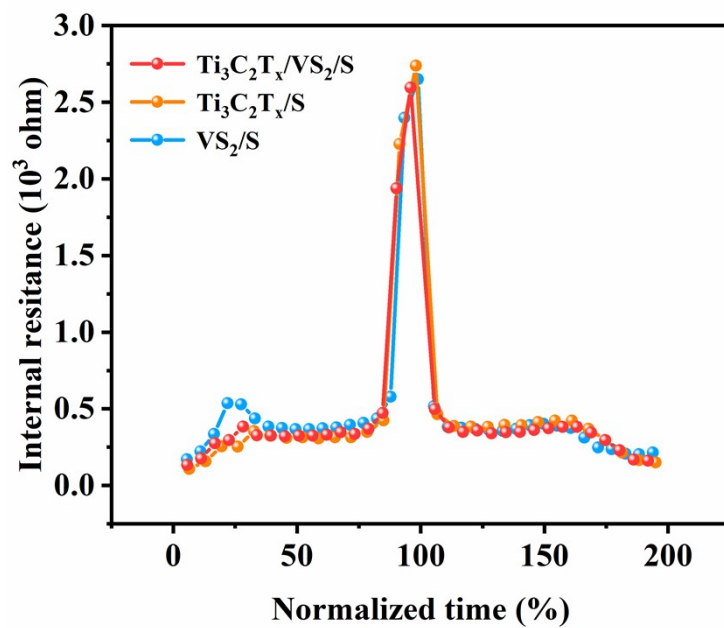

**Figure S10.** The corresponding internal resistances of  $\text{Ti}_3\text{C}_2\text{T}_x/\text{VS}_2/\text{S}$ ,  $\text{Ti}_3\text{C}_2\text{T}_x/\text{S}$ , and  $\text{VS}_2/\text{S}$  during the discharging and charging process.



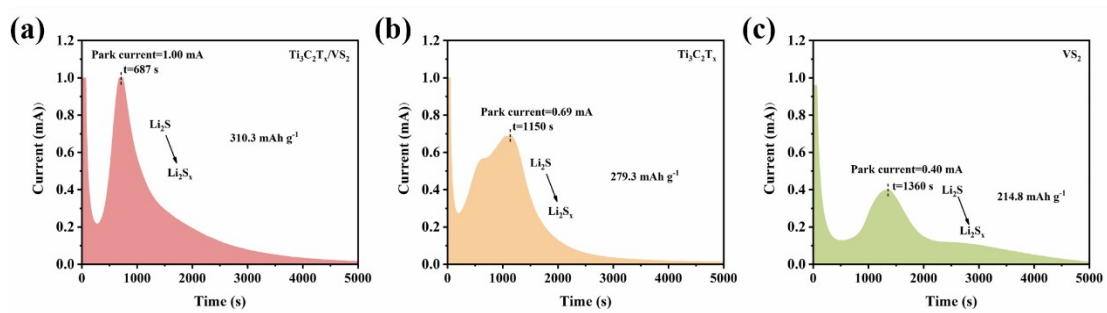

**Figure S11.**  $\text{Li}_2\text{S}$  dissolution profiles of  $\text{Ti}_3\text{C}_2\text{T}_x/\text{VS}_2$ ,  $\text{Ti}_3\text{C}_2\text{T}_x$ , and  $\text{VS}_2$ .

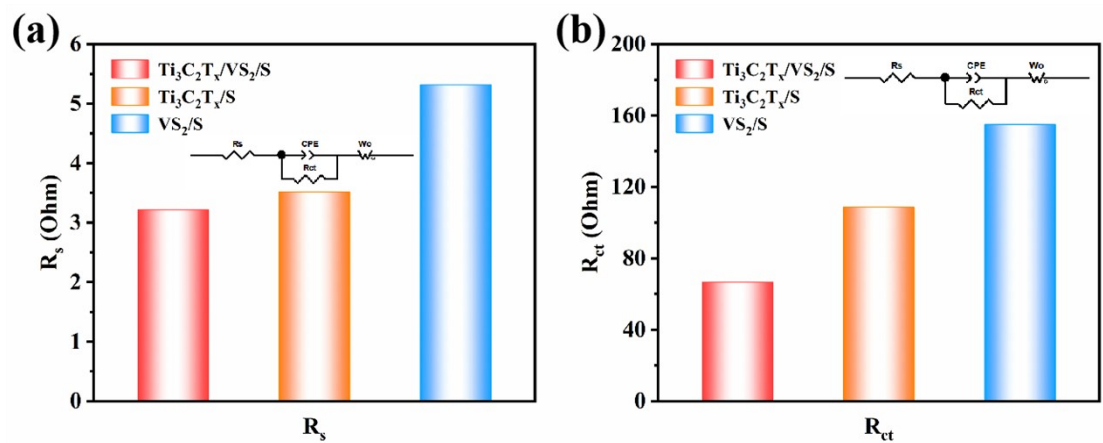

**Figure S12.** (a) Fitted  $R_s$  and (b)  $R_{ct}$  values for  $\text{Ti}_3\text{C}_2\text{T}_x/\text{VS}_2$ ,  $\text{Ti}_3\text{C}_2\text{T}_x$ , and  $\text{VS}_2$ .

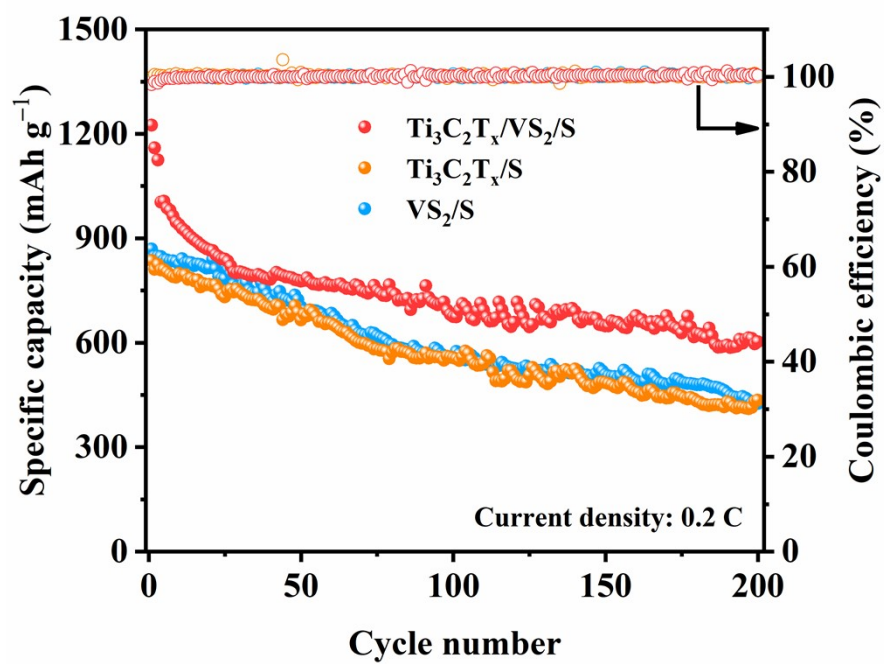

**Figure S13.** Cycling performance of the cells at 0.2 C.

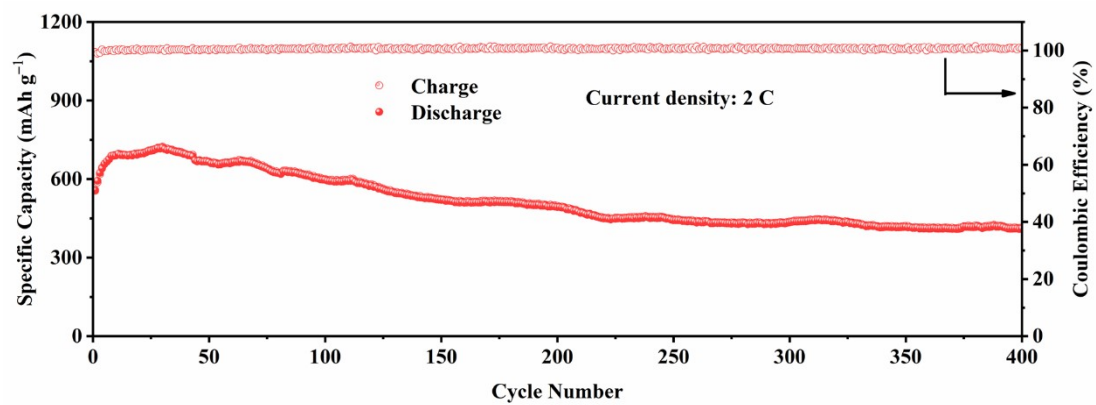

**Figure S14.** Cycling performance of the  $\text{Ti}_3\text{C}_2\text{T}_x/\text{VS}_2/\text{S}$  at 2 C.

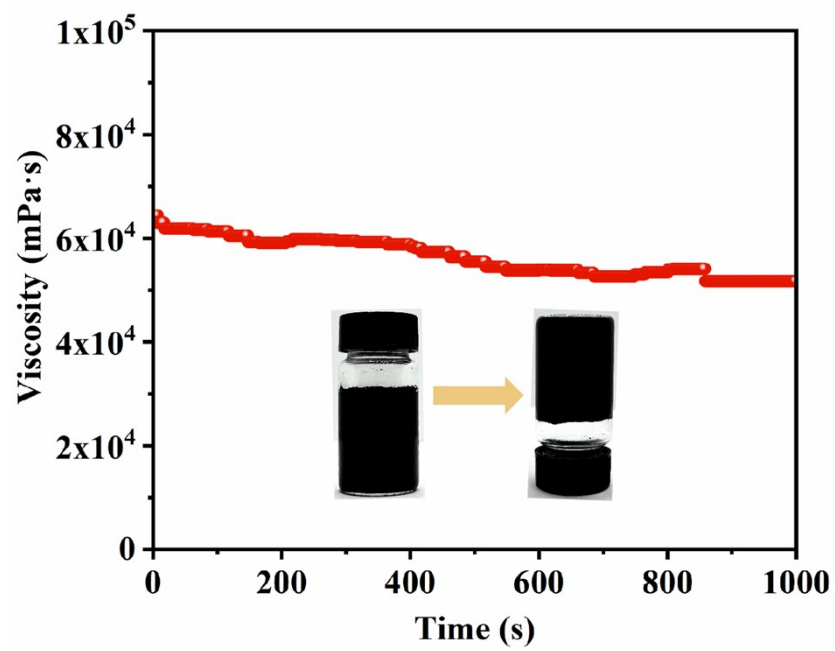

**Figure S15.** The viscosity of the printing slurry.

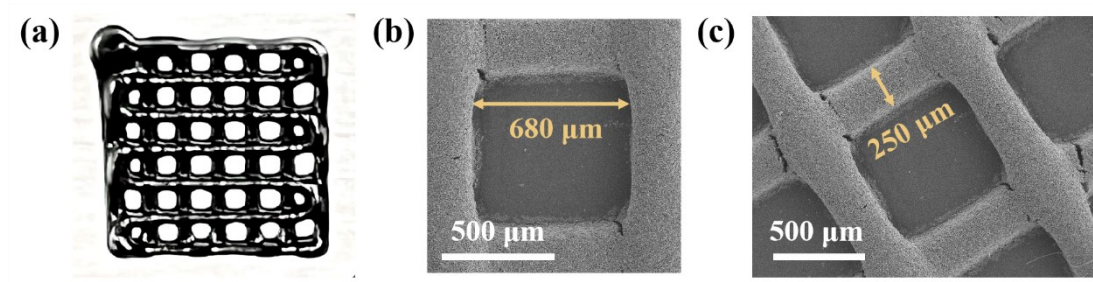

**Figure S16.** (a) Diagram of the 3D printed grid structure. (b-c) SEM image of the grid structure.

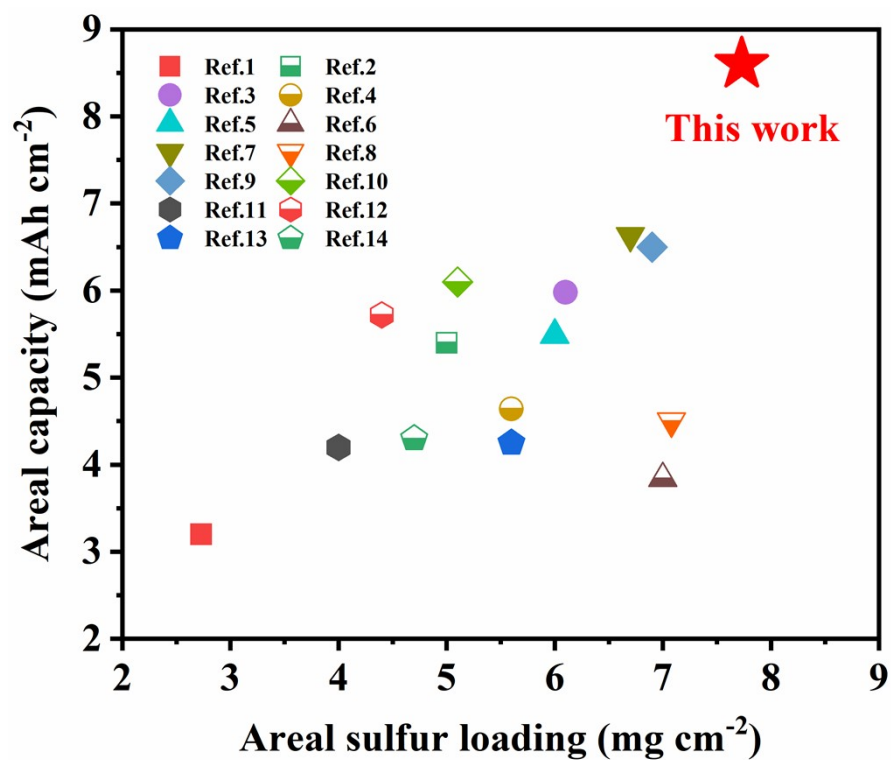

**Figure S17.** Comparison of area capacity of  $\text{Ti}_3\text{C}_2\text{T}_x/\text{VS}_2/\text{S}$  positive electrode with other electrodes. <sup>1-14</sup>

## References

1. W. Xi, J. Zhang, Y. Zhang, R. Wang, Y. Gong, B. He, H. Wang and J. Jin, *J. Mater. Chem. A*, 2023, **11**, 7679-7689.
2. S. Wu, W. Wang, J. Shan, X. Wang, D. Lu, J. Zhu, Z. Liu, L. Yue and Y. Li, *Energy Storage Mater.*, 2022, **49**, 153-163.
3. B. Wang, R. Fang, K. Chen, S. Huang, R. Niu, Z. Yu, G. E. P. O'Connell, H. Jin, Q. Lin, J. Liang, J. M. Cairney and D. W. Wang, *Small*, 2024, **20**, 2310801.
4. J. Lei, X. X. Fan, T. Liu, P. Xu, Q. Hou, K. Li, R. M. Yuan, M. S. Zheng, Q. F. Dong and J. J. Chen, *Nat. Commun.*, 2022, **13**, 202.
5. X. Y. Li, S. Feng, M. Zhao, C. X. Zhao, X. Chen, B. Q. Li, J. Q. Huang and Q. Zhang, *Angew. Chem. Int. Ed.*, 2022, **61**, e202114671.
6. W. Hou, P. Feng, X. Guo, Z. Wang, Z. Bai, Y. Bai, G. Wang and K. Sun, *Adv. Mater.*, 2022, **34**, e2202222.
7. D. Yang, Z. Liang, P. Tang, C. Zhang, M. Tang, Q. Li, J. J. Biendicho, J. Li, M. Heggen, R. E. Dunin-Borkowski, M. Xu, J. Llorca, J. Arbiol, J. R. Morante, S. L. Chou and A. Cabot, *Adv. Mater.*, 2022, **34**, e2108835.
8. X. Li, Q. Guan, Z. Zhuang, Y. Zhang, Y. Lin, J. Wang, C. Shen, H. Lin, Y. Wang, L. Zhan and L. Ling, *ACS Nano*, 2023, **17**, 1653-1662.
9. M. Wang, Y. Song, Z. Sun, Y. Shao, C. Wei, Z. Xia, Z. Tian, Z. Liu and J. Sun, *ACS Nano*, 2019, **13**, 13235-13243.
10. Y. Song, W. Zhao, L. Kong, L. Zhang, X. Zhu, Y. Shao, F. Ding, Q. Zhang, J. Sun



- and Z. Liu, *Energy Environ. Sci.*, 2018, **11**, 2620-2630.
11. J. Wu, J. Chen, Y. Huang, K. Feng, J. Deng, W. Huang, Y. Wu, J. Zhong and Y. Li, *Sci. Bull.*, 2019, **64**, 1875-1880.
  12. M. Wang, H. Yang, K. Shen, H. Xu, W. Wang, Z. Yang, L. Zhang, J. Chen, Y. Huang, M. Chen, D. Mitlin and X. Li, *Small Methods*, 2020, **4**, 2000353.
  13. Q. Zeng, X. Li, W. Gong, S. Guo, Y. Ouyang, D. Li, Y. Xiao, C. Tan, L. Xie, H. Lu, Q. Zhang and S. Huang, *Adv. Energy Mater.*, 2022, **12**, 2104074.
  14. C. Li, W. Ge, S. Qi, L. Zhu, R. Huang, M. Zhao, Y. Qian and L. Xu, *Adv. Energy Mater.*, 2022, **12**, 2103915.
